# Supplementary material for: Binuclear and tetranuclear Zn(ii) complexes with thiosemicarbazones: synthesis, X-ray crystal structures, ATP-sensing, DNA-binding, phosphatase activity and theoretical calculations
Source: Royal Society of Chemistry journal article supplement (doi:10.1039/c9ra10549b), 2020-01-01
Supplement: c9ra10549b1.pdf [file c9ra10549b1.pdf]

# Binuclear and Tetranuclear Zn(II) Complexes With Thiosemicarbazones: Synthesis, X-ray Crystal Structures, ATP-sensing, DNA-binding, Phosphatase activity and theoretical calculations

Piyali Adak,<sup>a</sup> Bipinbihari Ghosh,<sup>a</sup> Antonio Bauzá,<sup>b</sup> Antonio Frontera,<sup>b</sup> Steven R. Herron,<sup>c</sup> Shyamal Kumar Chattopadhyay<sup>a\*</sup>

† Department of Chemistry, Indian Institute of Engineering Science and Technology, Shibpur, Howrah 711 103, India

‡ Department of Chemistry, University of the Balearic Islands, Carretera de Valldemossa km 7.5, 07122 Palma de Mallorca, IllesBalears, Spain

§ Department of Chemistry, Utah Valley University, 800W University Pkwy, Orem UT 84058, USA

## Contents

|                                                                                                                                                                                                                                                         |    |
|---------------------------------------------------------------------------------------------------------------------------------------------------------------------------------------------------------------------------------------------------------|----|
| 1. <b>Figure S1:</b> Mass spectra of $H_2L^1$ .....                                                                                                                                                                                                     | 3  |
| 2. <b>Figure S2:</b> NMR spectra of $H_2L^1$ .....                                                                                                                                                                                                      | 3  |
| 3. <b>Figure S3:</b> Extended NMR spectra of $H_2L^1$ .....                                                                                                                                                                                             | 4  |
| 4. <b>Figure S4:</b> Mass spectra of $H_2L^2$ .....                                                                                                                                                                                                     | 4  |
| 5. <b>Figure S5:</b> NMR spectra of $H_2L^2$ .....                                                                                                                                                                                                      | 5  |
| 6. <b>Figure S6:</b> Extended NMR spectra of $H_2L^2$ .....                                                                                                                                                                                             | 5  |
| 7. <b>Figure S7:</b> Mass spectra of complex <b>1</b> .....                                                                                                                                                                                             | 6  |
| 8. <b>Figure S8:</b> NMR spectra of complex <b>1</b> .....                                                                                                                                                                                              | 6  |
| 9. <b>Figure S9:</b> Extended NMR spectra of complex <b>1</b> .....                                                                                                                                                                                     | 7  |
| 10. <b>Figure S10:</b> Mass spectra of complex <b>2</b> .....                                                                                                                                                                                           | 7  |
| 11. <b>Figure S11:</b> NMR spectra of complex <b>2</b> .....                                                                                                                                                                                            | 8  |
| 12. <b>Figure S12:</b> Extended NMR spectra of complex <b>2</b> .....                                                                                                                                                                                   | 8  |
| 13. <b>Figure S13:</b> IR spectra of $L^1 H_2$ and complex <b>1</b> .....                                                                                                                                                                               | 9  |
| 14. <b>Figure S14:</b> IR spectra of $L^2 H_2$ and complex <b>2</b> .....                                                                                                                                                                               | 9  |
| 15. <b>Figure S15:</b> UV-vis absorption change of complexes <b>1</b> and <b>2</b> ( $1 \times 10^{-5}$ M) in the presence of 24 equiv of different anions at a) Complex <b>1</b> at 343 nm and b) complex <b>2</b> at 260 nm. ....                     | 10 |
| 16. <b>Figure S16:</b> a) Red bars: UV-visible absorbance of complex <b>1</b> ( $1 \times 10^{-5}$ ) in presence of 8 equiv of ATP. Green bars: UV-visible spectrum of complex <b>1</b> ( $1 \times 10^{-5}$ ) in presence of 8 equiv of ATP & 24 equiv |    |

of other anions. b) Blue bars: UV-visible absorbance of complex **2** ( $1 \times 10^{-5}$ ) in presence of 8 equiv of ATP. Orange bars: UV-visible spectrum of complex **2** ( $1 \times 10^{-5}$ ) in presence of 8 equiv of ATP & 24 equiv of other anions .....10

**17. Figure S17:** Benesi-Hildebrand plot for determination of  $K_a$  values of complexes **1(a)** and **2(b)** with ATP.....11-12

**18. Figure S18:** Detection limit and calibration curves of a) complexes **1** and b) complex **2** with ATP.....12-13

**19. Figure S19:** Plots of  $[DNA]/(\epsilon_a - \epsilon_f)$  vs.  $[DNA]$  for the titration of DNA with the a) complex **1** b) complex **2**. .....13

**20. Figure S20:** Plot of a)  $I_0/I$  vs.  $[Complex\ 1]$  b)  $I_0/I$  vs.  $[Complex\ 1]$ . .....13

**21. Figure S21.** Time dependent spectra of PNPP ( $10^{-4}$  M) and PNPP( $10^{-4}$  M) in presence of  $Zn(OAc)_2$  solution ( $10^{-5}$  M).....14

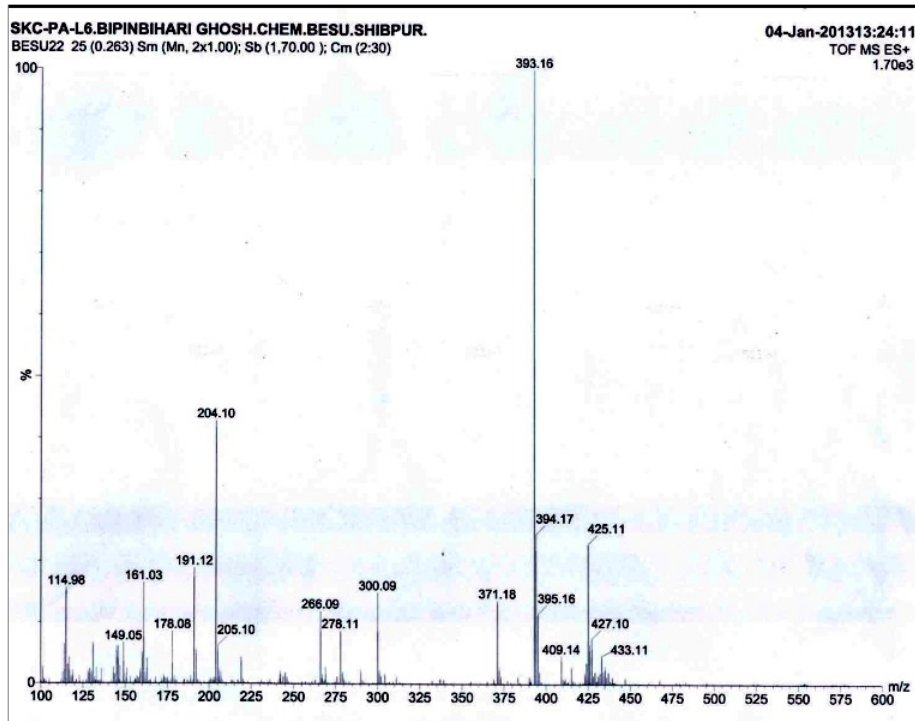

1. Figure S1: Mass spectra of  $H_2L^1$

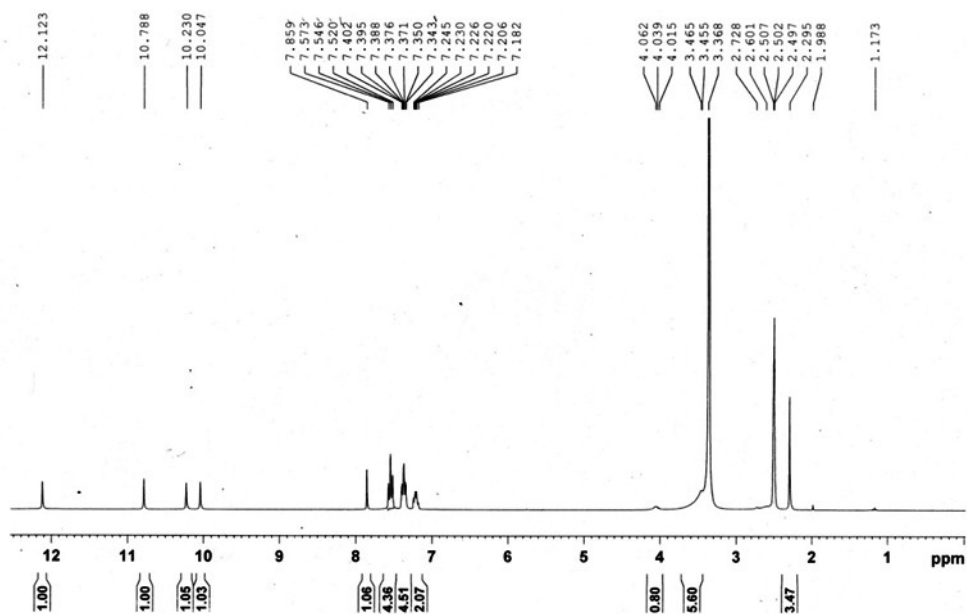

2. Figure S2: NMR spectra of  $H_2L^1$

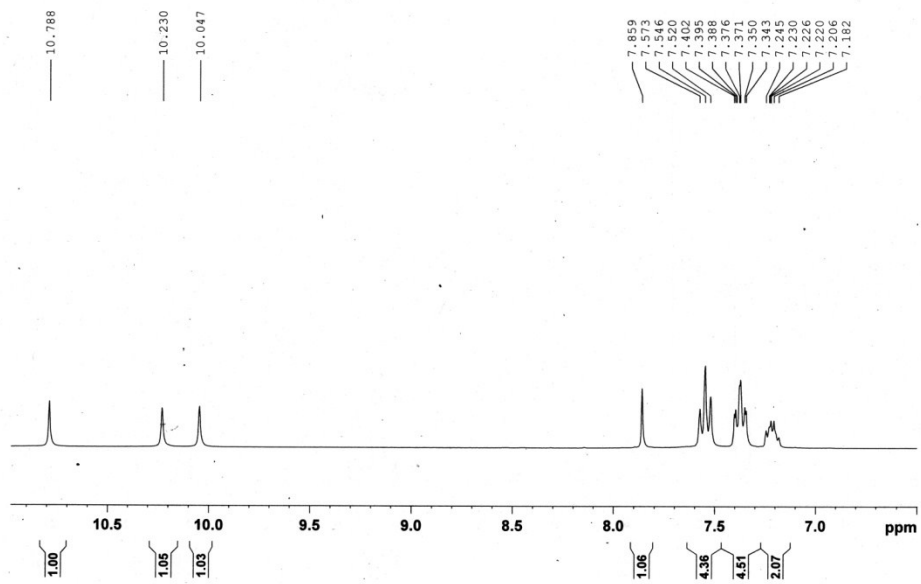

3. Figure S3: Extended NMR spectra of  $H_2L^1$

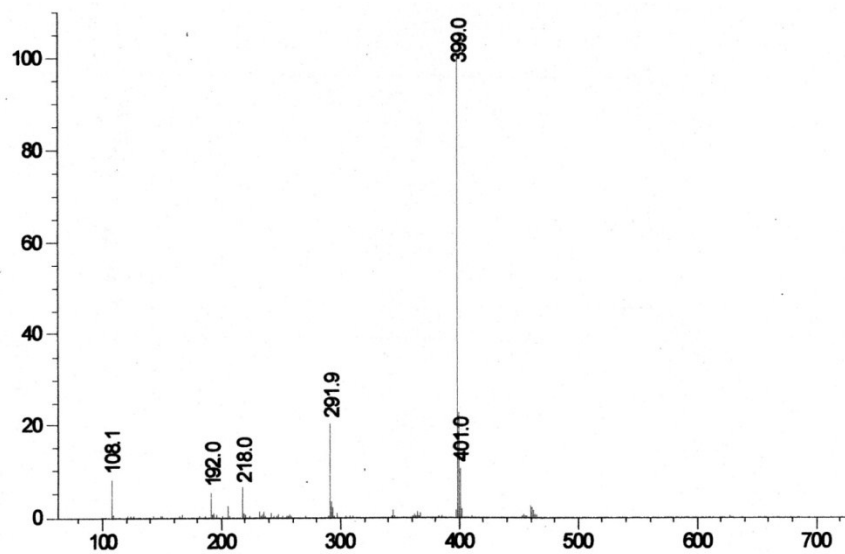

4. Figure S4: Mass spectra of  $H_2L^2$

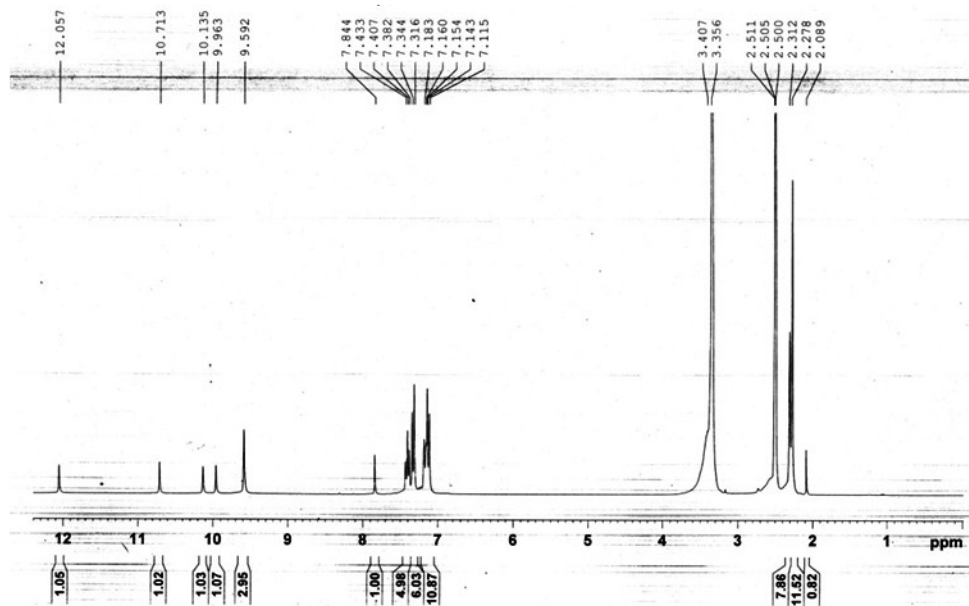

5. Figure S5: NMR spectra of  $H_2L^2$

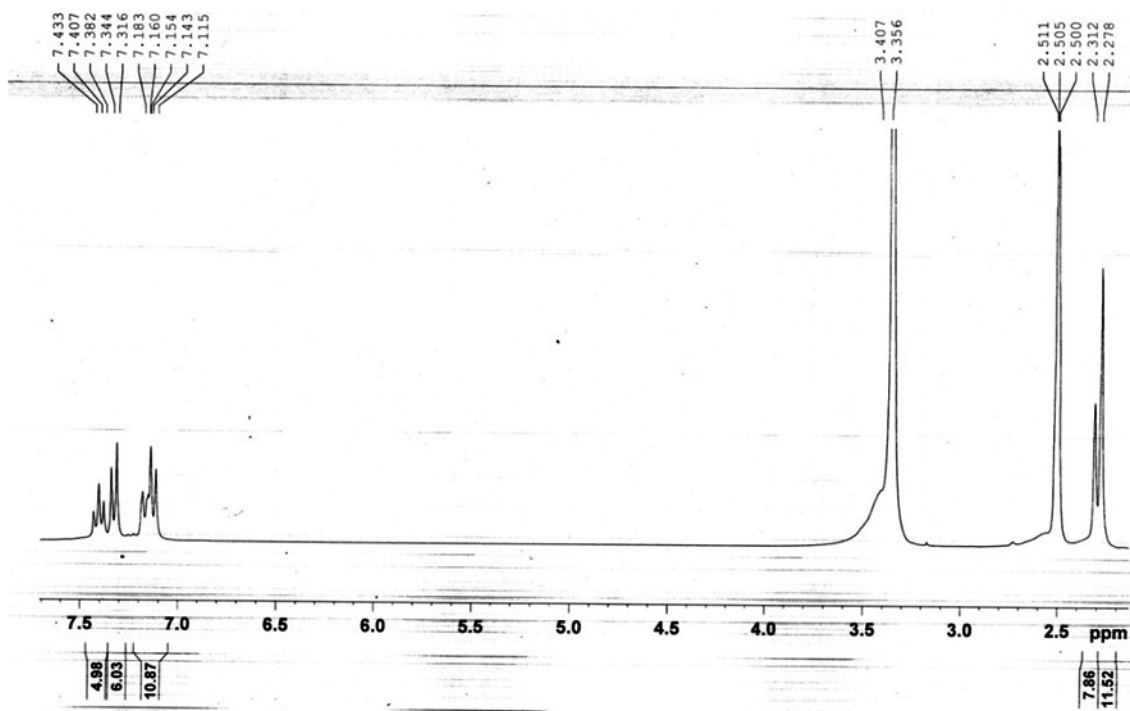

6. Figure S6: Extended NMR spectra of  $H_2L^2$

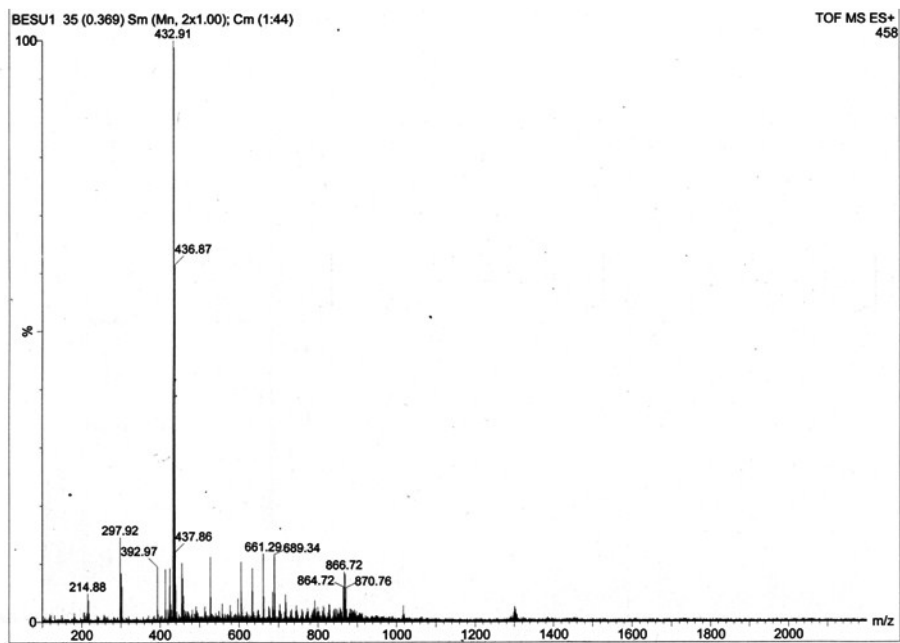

7. Figure S7: Mass spectra of complex 1

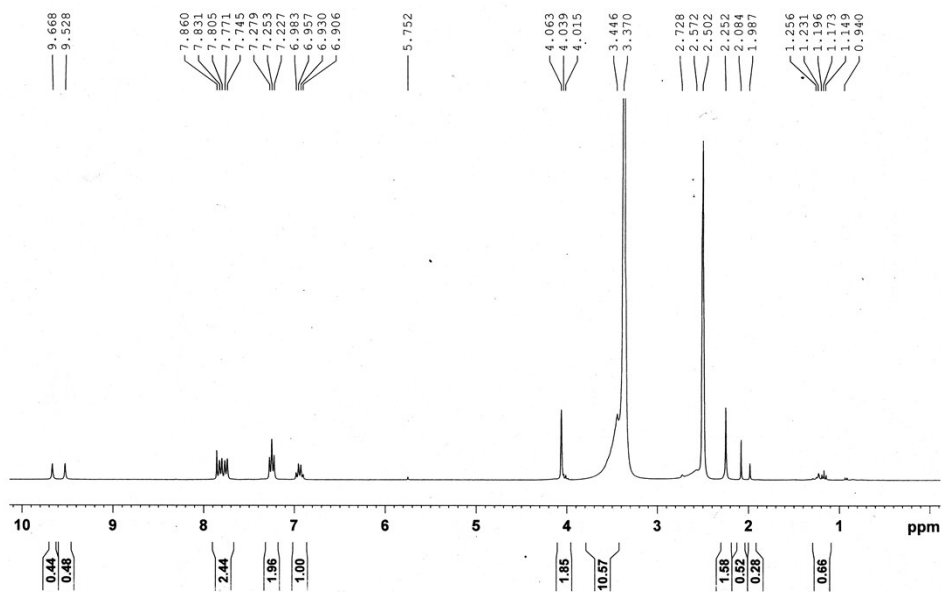

8. Figure S8: NMR spectra of complex 1

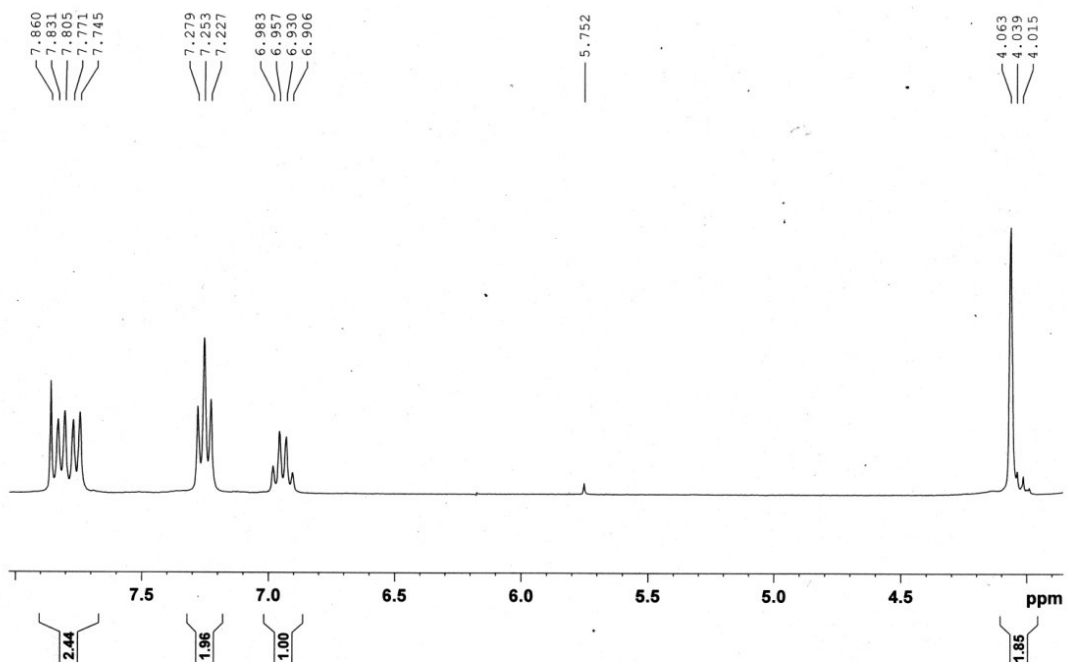

9. Figure S9: Extended NMR spectra of complex 1

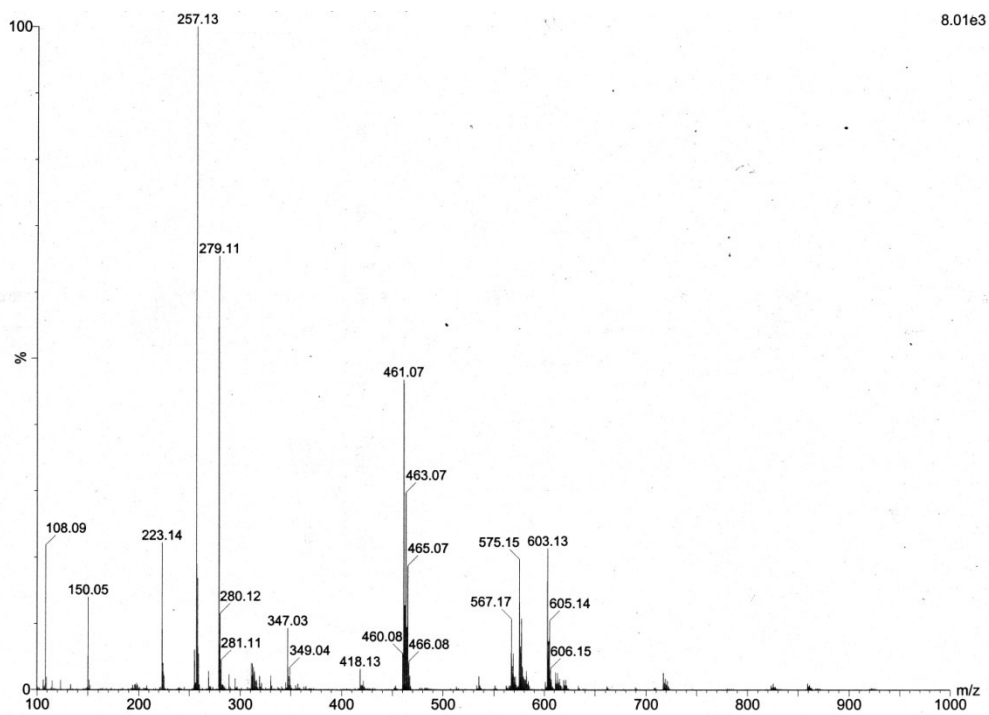

10. Figure S10: Mass spectra of complex 2

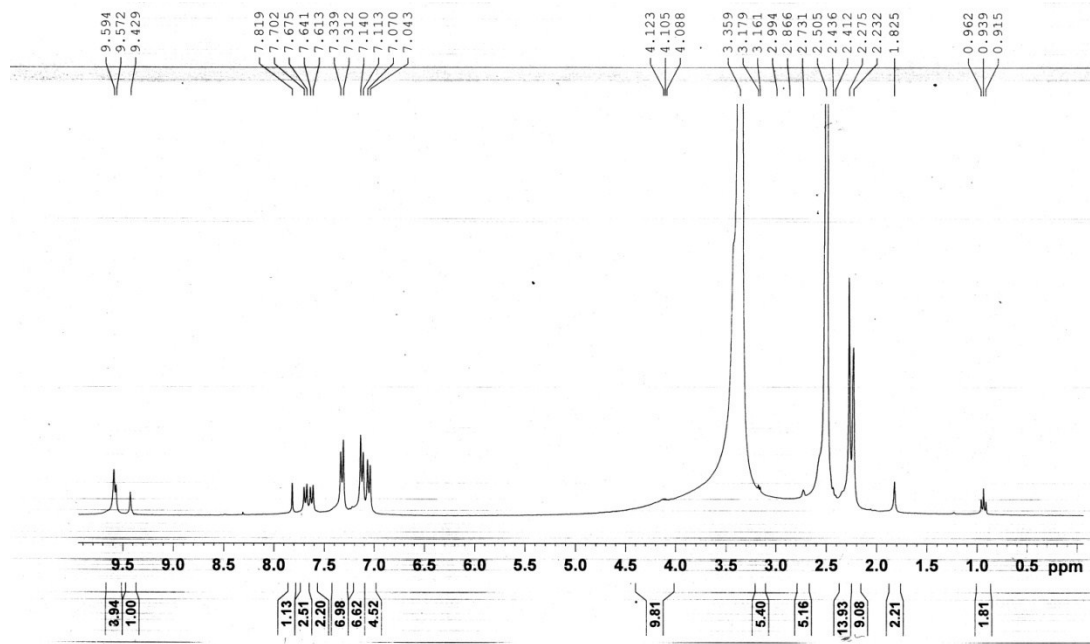

11. Figure S11: NMR spectra of complex 2

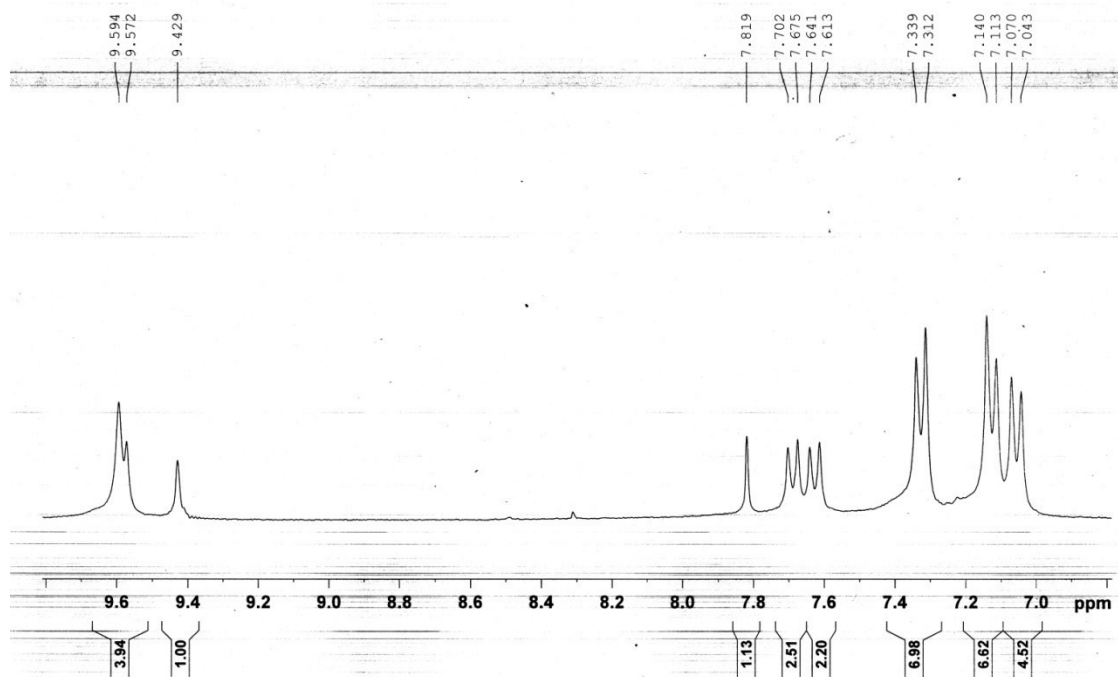

12. Figure S12: Extended NMR spectra of complex 2



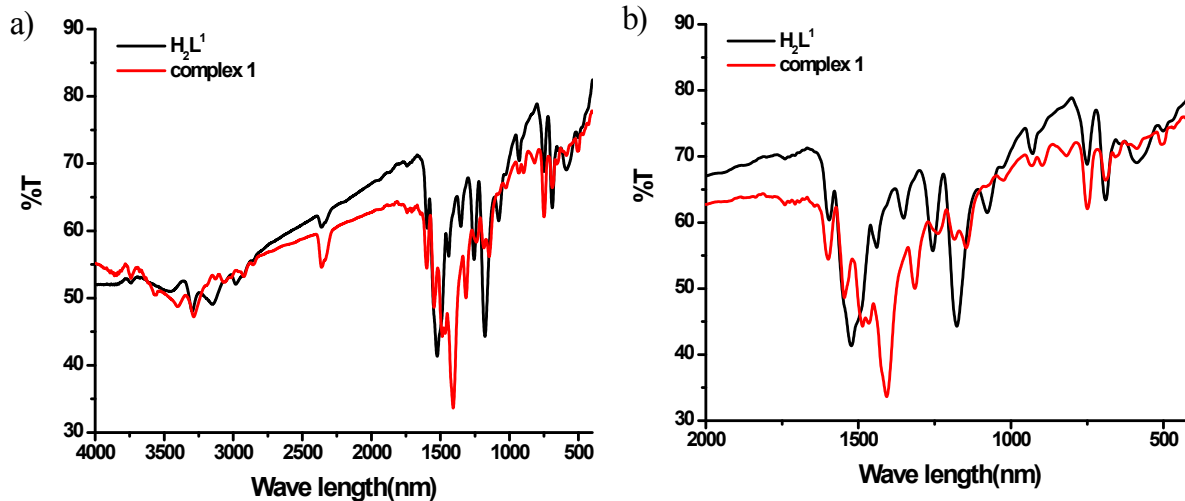

13. Figure S13: IR spectra of  $L^1 H_2$  and complex 1

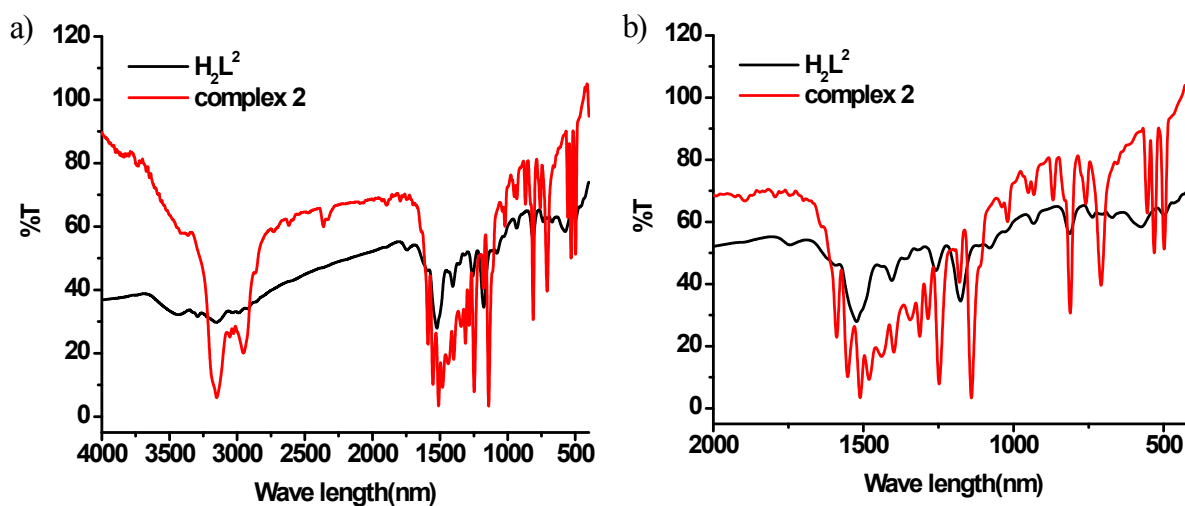

14. Figure S14: IR spectra of  $L^2 H_2$  and complex 2

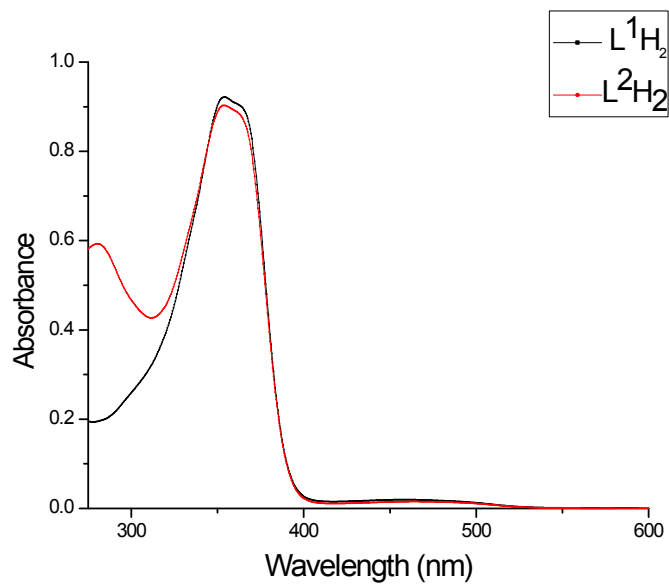

Electronic spectra of the free ligands in DMF solution.

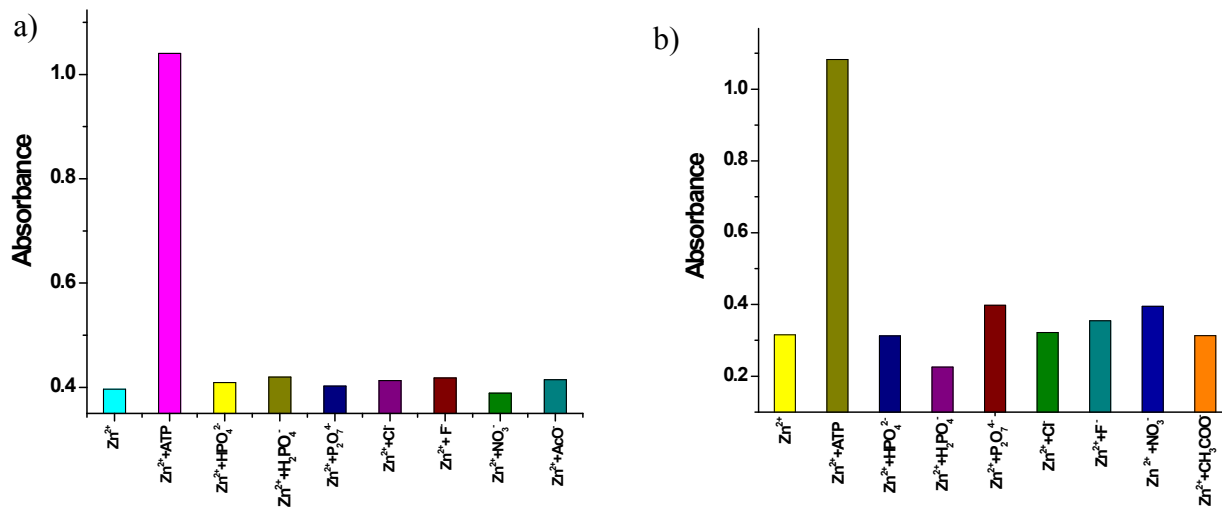

**15. Figure S15:**UV-vis absorption change of complexes **1** and **2** ( $1 \times 10^{-5}$  M) in the presence of 24 equiv of different anions at a) Complex **1** at 343 nm and b) complex **2** at 260 nm.

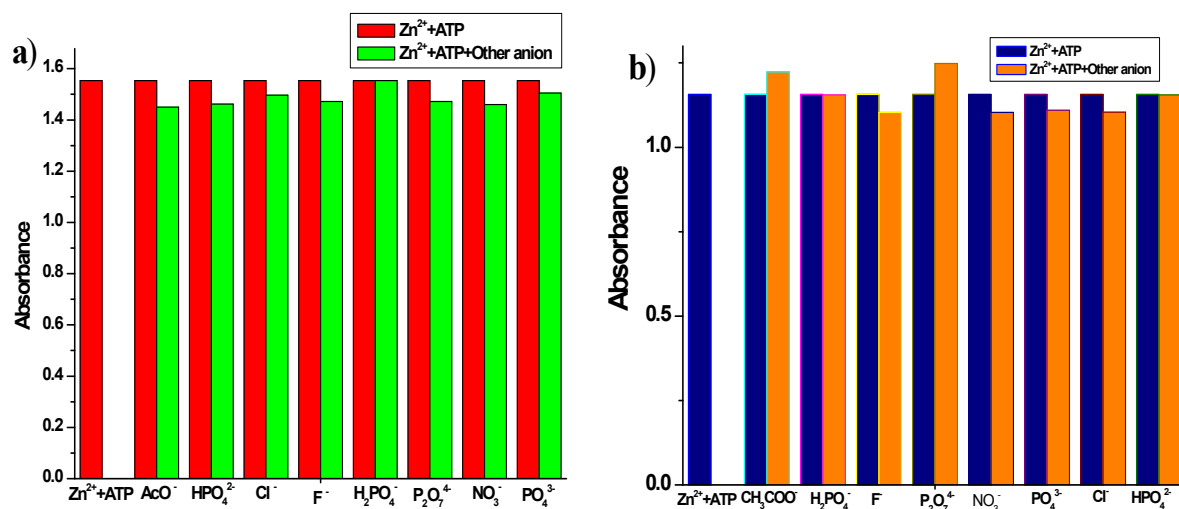

**16. Figure S16:** a) Red bars: UV-visible absorbance of complex **1** ( $1 \times 10^{-5}$ ) in presence of 8 equiv of ATP. Green bars: UV-visible spectrum of complex **1** ( $1 \times 10^{-5}$ ) in presence of 8 equiv of ATP & 24 equiv of other anions. b) Blue bars: UV-visible absorbance of complex **2** ( $1 \times 10^{-5}$ ) in presence of 8 equiv of ATP. Orange bars: UV-visible spectrum of complex **2** ( $1 \times 10^{-5}$ ) in presence of 8 equiv of ATP & 24 equiv of other anions

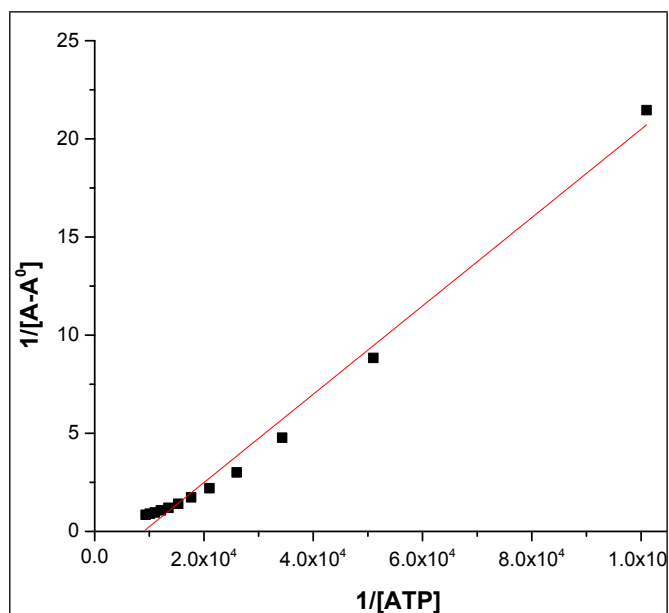

(a)

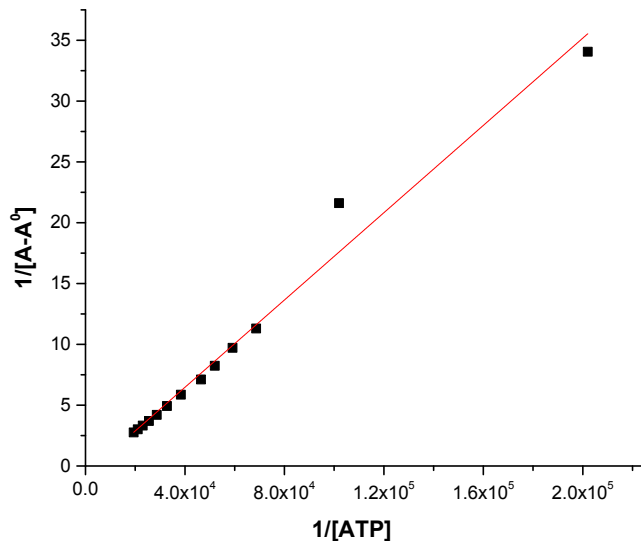

(b)

17. **Figure S17:** Benesi-Hildeband plot for determination of  $K_a$  values of complexes **1(a)** and **2(b)** with ATP.

The Benesi-Hildeband equation used is :  $1/\Delta A = 1/\Delta A_{\max} + (1/K_b[C]) (1/\Delta A_{\max})$ , where  $\Delta A$  and  $\Delta A_{\max}$  are the change in absorbance at a given concentration of ATP, and when all the metal complex is fully bound to ATP respectively,  $[C] = [ATP]$ .

The detection limit DL of **Complexes** for ATP was determined from the following equation:  $DL = K \times Sb1/S$ . Where  $K = 2$  or  $3$  (we take  $2$  in this case);  $Sb1$  is the standard deviation;  $S$  is the slope of the calibration curve.

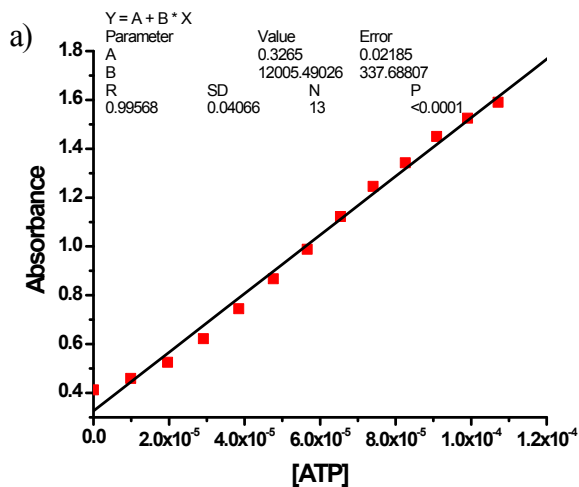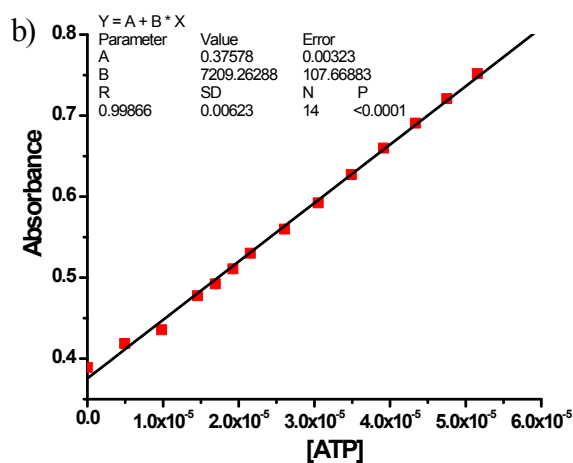

**18. Figure S18:** Detection limit and calibration curves of a) complex 1 and b) complex 2 with ATP.

From the Absorbance vs. [ATP] graphs (S17), we get slope = 12005.49026, and Sb1 value is 0.04066 for complex 1. Thus using the formula, we get the Detection Limit for Complex 1 =  $6.7 \times 10^{-6}$ . Similarly for complex 2 Detection Limit =  $1.7 \times 10^{-6}$ .

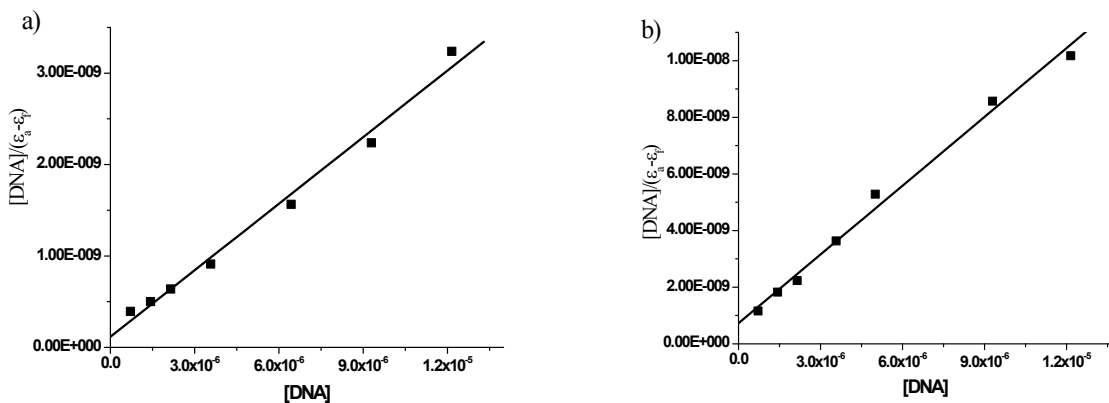

**19. Figure S19:** Plots of [DNA]/(ε<sub>a</sub> - ε<sub>f</sub>) vs. [DNA] for the titration of DNA with the a) complex 1 b) complex 2.

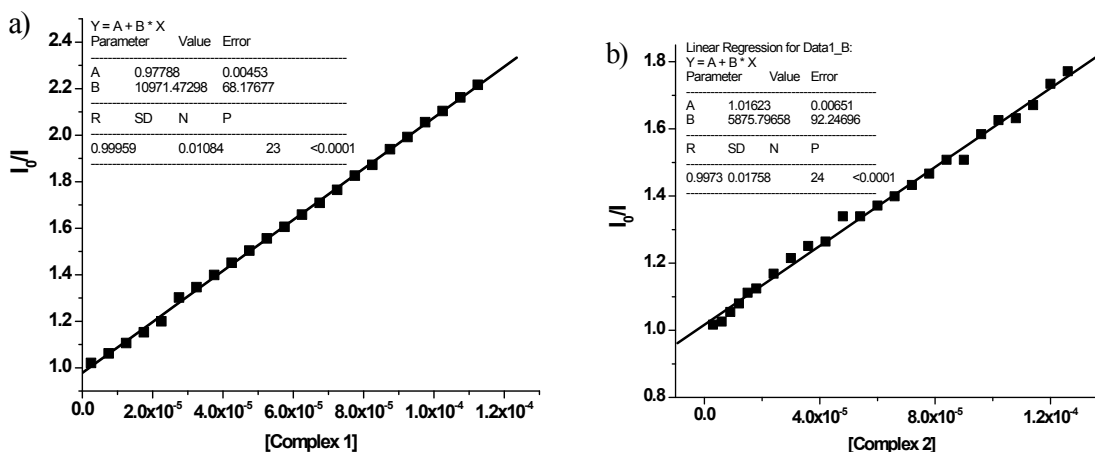

**20. Figure S20:** Plot of a)  $I_0/I$  vs. [Complex 1] b)  $I_0/I$  vs. [Complex 2].

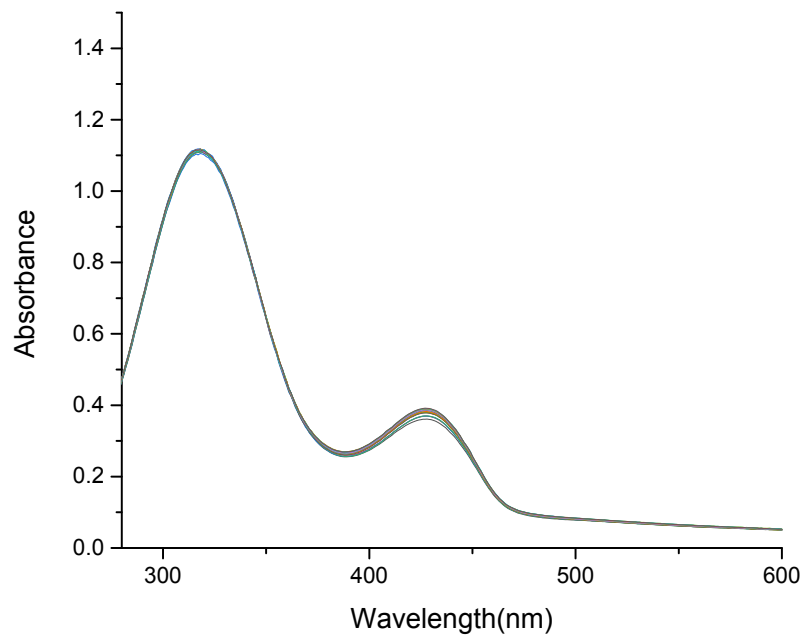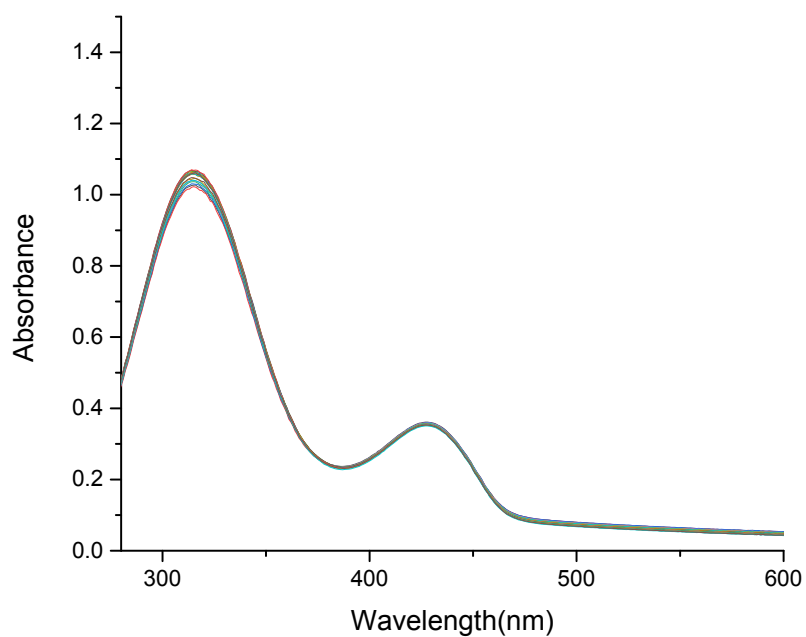

**21. Figure S21.** Time dependent spectra of PNPP ( $10^{-4}$  M) and PNPP( $10^{-4}$  M) in presence of Zn(OAc)<sub>2</sub> solution ( $10^{-5}$  M).
